# Supplementary material for: Iatrogenic factors contributed to the high rate of preterm birth in a community hospital
Source: PubMed Central journal article supplement — Transl Pediatr. 2021 Oct;10(10):2602–13. doi: 10.21037/tp-21-458 (PMC8578777; doi:10.21037/tp-21-458), 2021-10
Supplement: tp-10-10-2602-dss.pdf [file tp-10-10-2602-dss.pdf]

## Data Sharing Statement

|                     |                                                                                                                                                     |                                                                                                                  |
|---------------------|-----------------------------------------------------------------------------------------------------------------------------------------------------|------------------------------------------------------------------------------------------------------------------|
| <b>Article Info</b> | <a href="https://dx.doi.org/10.21037/tp-21-458">https://dx.doi.org/10.21037/tp-21-458</a>                                                           |                                                                                                                  |
| <b>Item</b>         | <b>Question</b>                                                                                                                                     | <b>Authors' Response<br/>(place "-" if not applicable)</b>                                                       |
| 1                   | Would you like to share data collected for your study to others?                                                                                    | No.                                                                                                              |
| 2                   | If not, would you like to share the reason for your decision?                                                                                       | Because this date is my hospital record about the patient birth, this record involves some individual privacy.   |
| 3                   | What data in particular will be shared?                                                                                                             | -                                                                                                                |
| 4                   | Any other documents will be shared? Such as study protocol, statistical analysis plan, informed consent form, clinical study report, analytic code. | Statistical analysis plan will also be shared if requested.                                                      |
| 5                   | When will data availability begin?                                                                                                                  | From the publication date.                                                                                       |
| 6                   | When will data availability end?                                                                                                                    | Two years within the publication date.                                                                           |
| 7                   | To whom will you share the data?                                                                                                                    | For analysis to pregnancy outcome.                                                                               |
| 8                   | For what type of analysis or purpose?                                                                                                               | For analysis to pregnancy outcome of the elderly women ( $\geq 35$ years of age).                                |
| 9                   | How or where can the data/documents be obtained?                                                                                                    | Emails could be sent to the address huangluhua@163.com.                                                          |
| 10                  | Any other restrictions?                                                                                                                             | We may balance the potential benefits and risks for each request and then provide the data that could be shared. |
